# Supplementary material for: Adaptive spectroscopic visible-light optical coherence tomography for clinical retinal oximetry
Source: PubMed Central journal article supplement (PMC10126115; doi:10.1038/s43856-023-00288-8), 2023-04-24
Supplement: 43856_2023_288_MOESM3_ESM.pdf [file 43856_2023_288_MOESM3_ESM.pdf]

## **Description of Additional Supplementary Files**

**File Name:** Supplementary Data 1

**Description:** Data used for figures 3, 4, and 5.
